# Supplementary material for: Sex-Related Differences in Outpatient Healthcare of Acute Coronary Syndrome: Evidence from an Italian Real-World Investigation
Source: MDPI journal article supplement (doi:10.3390/jcm12082972), 2023-04-19
Supplement: s1 [file s1]

# Sex-Related Differences in Outpatient Healthcare of Acute Coronary Syndrome: Evidence from an Italian Real-World Investigation

Raffaella Ronco <sup>1,2,\*</sup>, Federico Rea <sup>1,2,\*</sup>, Amelia Filippelli <sup>1,3</sup>, Aldo Pietro Maggioni <sup>4</sup> and Giovanni Corrao <sup>1,2</sup>

<sup>1</sup> National Centre for Healthcare Research and Pharmacoepidemiology, University of Milano-Bicocca, Milan 20126, Italy; raffaella.ronco@unimib.it (R.R.); afillipelli@unisa.it (A.F.); giovanni.corrao@unimib.it (G.C.)

<sup>2</sup> Unit of Biostatistics, Epidemiology and Public Health, Department of Statistics and Quantitative Methods, University of Milano-Bicocca, Milan 20126, Italy

<sup>3</sup> Department of Medicine, Surgery, and Dentistry, University of Salerno, Baronissi 84081, Italy

<sup>4</sup> ANMCO Research Center, Florence 50121, Italy; maggioni@heartcarefoundation.it

\* Correspondence: federico.rea@unimib.it; Tel.: +39-026-448-5859

## SUPPLEMENTARY MATERIAL

**Table S1.** Clinical diagnoses, drugs and outpatient services codes used for the study purpose.

|                                                    | Codes                                                           |
|----------------------------------------------------|-----------------------------------------------------------------|
| <b>Diseases <sup>†</sup></b>                       |                                                                 |
| Cardiovascular disease                             | 390 – 459                                                       |
| Acute coronary syndrome                            | 410.xx, 411.1x                                                  |
| Myocardial infraction                              | 410.xx                                                          |
| Unstable angina                                    | 411.1x                                                          |
| Hypertension                                       | 401 – 405                                                       |
| Cerebrovascular disease                            | 430.x – 438.x                                                   |
| Diabetes                                           | 250.x                                                           |
| Dyslipidaemia                                      | 272                                                             |
| Chronic kidney disease                             | 585.x                                                           |
| COPD                                               | 491, 492, 494, 496                                              |
| Cancer                                             | 140.x-208.x                                                     |
| Depression                                         | 296.2, 296.3, 296.82, 296.90, 298.0, 300.4, 309.0, 309.1, 311.x |
| <b>Rehabilitation hospitalization <sup>‡</sup></b> | 56                                                              |
| <b>Drugs <sup>§</sup></b>                          |                                                                 |
| Antihypertensives                                  | C02, C03, C07, C08, C09                                         |

|                                     |                                       |
|-------------------------------------|---------------------------------------|
| Beta-blockers                       | C07                                   |
| Renin-angiotensin system inhibitors | C09                                   |
| Antiarrhythmics                     | C01B                                  |
| Antidiabetics                       | A10                                   |
| Statins                             | C10AA                                 |
| Anticoagulant                       | B01AA, B01AE, B01AF                   |
| Antiplatelet                        | B01AC04, B01AC05, B01AC22, B01AC24    |
| Drugs for pulmonary diseases        | R03                                   |
| Antidepressants                     | N06A                                  |
| <b>Outpatient services</b> //       |                                       |
| Rehabilitation                      | MAC06, MAC07, MAC08                   |
| Electrocardiogram                   | 89.50, 89.51, 89.52, 89.44.1, 89.48.2 |
| Echocardiogram                      | 88.72                                 |
| Cardiological examination           | 89.01.3, 89.7A.3                      |
| Lipid profile                       | 90.13, 90.14.3, 90.43.2               |

† According to the ICD-9-CM (International Classification of Disease, 9th Revision) system, ‡ According to the hospital ward coding; § According to the ATC (Anatomical-Therapeutic-Chemical) classification system;// According to the regional outpatients services coding.

**Table S2.** Weights used to adjust the drug coverage of beta-blockers prescriptions.

| ATC     | Weight |
|---------|--------|
| C07AA03 | 2      |
| C07AA05 | 1.3    |
| C07AA07 | 1      |
| C07AB02 | 3      |
| C07AB03 | 1.5    |
| C07AB04 | 1      |
| C07AB05 | 1      |
| C07AB07 | 4      |
| C07AB12 | 2      |
| C07AG02 | 6      |
| C07BB07 | 4      |
| C07CB02 | 1.5    |
| C07CB03 | 1.5    |

The drug coverage calculated according to the defined daily dose (DDD) was multiplied for the weights reported in this table, or, in an equivalent manner, the daily dose was calculated dividing the DDD for these weights.

**Table S3.** Characteristics of cohort 2 members before and after matching.

|                                     | Cohort 2<br>(N=85,429) |                   |                                |              | Matched cohort 2<br>(N=31,360) |                   |                                |              |
|-------------------------------------|------------------------|-------------------|--------------------------------|--------------|--------------------------------|-------------------|--------------------------------|--------------|
|                                     | Women<br>(N=29,173)    | Men<br>(N=56,256) | Standardiz<br>ed<br>difference | p-<br>value* | Women<br>(N=20,079)            | Men<br>(N=20,079) | Standardi<br>zed<br>difference | p-<br>value* |
| <b>Age (years)</b>                  |                        |                   | 0.66                           | <0.001       |                                |                   | 0.06                           | 0.479        |
| 40 – 60                             | 3,857<br>(13.2%)       | 17,288<br>(30.7%) |                                |              | 3,424<br>(17.1%)               | 3,187<br>(15.9%)  |                                |              |
| 61 – 70                             | 5,210<br>(17.9%)       | 14,997<br>(26.7%) |                                |              | 4,166<br>(20.7%)               | 4,339<br>(21.6%)  |                                |              |
| 71 – 80                             | 9,464<br>(32.4%)       | 15,566<br>(27.7%) |                                |              | 6,549<br>(32.6%)               | 7,062<br>(35.2%)  |                                |              |
| 81 – 90                             | 10,642<br>(36.5%)      | 8,405<br>(14.9%)  |                                |              | 5,940<br>(29.6%)               | 5,491<br>(27.3%)  |                                |              |
| <b>ACS diagnosis</b>                |                        |                   | 0.12                           | <0.001       |                                |                   | 0.00                           | 0.777        |
| STEMI                               | 12,051<br>(41.3%)      | 26,624<br>(47.3%) |                                |              | 8,501<br>(42.3%)               | 8,477<br>(42.2%)  |                                |              |
| NSTEMI                              | 10,680<br>(36.6%)      | 18,301<br>(32.5%) |                                |              | 7,145<br>(35.6%)               | 7,237<br>(36.0%)  |                                |              |
| Unstable angina                     | 6,442<br>(22.1%)       | 11,331<br>(20.1%) |                                |              | 4,433<br>(22.1%)               | 4,365<br>(21.7%)  |                                |              |
| <b>Clinical profile<sup>†</sup></b> |                        |                   | 0.32                           | <0.001       |                                |                   | 0.11                           | <0.001       |
| Good                                | 5,248<br>(18.0%)       | 16,990<br>(30.2%) |                                |              | 3,920<br>(19.5%)               | 4,615<br>(23.0%)  |                                |              |
| Intermediate                        | 9,139<br>(31.3%)       | 17,840<br>(31.7%) |                                |              | 6,508<br>(32.4%)               | 6,028<br>(30.0%)  |                                |              |
| Poor                                | 11,207<br>(38.4%)      | 15,854<br>(28.2%) |                                |              | 7,334<br>(36.5%)               | 6,905<br>(34.4%)  |                                |              |
| Very poor                           | 3,579<br>(12.3%)       | 5,572<br>(9.9%)   |                                |              | 2,317<br>(11.5%)               | 2,531<br>(12.6%)  |                                |              |
| <b>Comorbidities<sup>‡</sup></b>    |                        |                   |                                |              |                                |                   |                                |              |
| Hypertension                        | 23,681<br>(81.2%)      | 37,971<br>(67.5%) | 0.32                           | <0.001       | 15,664<br>(78.0%)              | 15,602<br>(77.7%) | 0.01                           | 0.456        |
| Dyslipidaemia                       | 11,280<br>(38.7%)      | 21,219<br>(37.7%) | 0.02                           | 0.007        | 7,888<br>(39.3%)               | 7,840<br>(39.1%)  | 0.00                           | 0.624        |
| Cerebrovascular disease             | 2,537<br>(8.7%)        | 3,671<br>(6.5%)   | 0.08                           | <0.001       | 1,658<br>(8.3%)                | 1,681<br>(8.4%)   | 0.00                           | 0.678        |
| Diabetes                            | 7,062<br>(24.2%)       | 12,562<br>(22.3%) | 0.04                           | <0.001       | 4,888<br>(24.3%)               | 4,768<br>(23.8%)  | 0.01                           | 0.161        |

|                       |                |                |      |        |               |               |      |       |
|-----------------------|----------------|----------------|------|--------|---------------|---------------|------|-------|
| Chronic renal failure | 308 (1.1%)     | 638 (1.1%)     | 0.01 | 0.300  | 204 (1.0%)    | 208 (1.0%)    | 0.00 | 0.843 |
| COPD                  | 10,216 (35.0%) | 16,189 (28.8%) | 0.13 | <0.001 | 6,862 (34.2%) | 6,865 (34.2%) | 0.00 | 0.975 |
| Depression            | 8,269 (28.3%)  | 7,391 (13.1%)  | 0.38 | <0.001 | 4,467 (22.3%) | 4,495 (22.4%) | 0.00 | 0.737 |

†Multisource Comorbidity Score is a comorbidity index obtained from inpatient diagnostic information and outpatient drug prescriptions, and validated using Italian data. Patients were categorized as having good (MCS: 0-4), intermediate (5-9), poor (10-14) or very poor ( $\geq 15$ ) clinical profile.

‡ Comorbidity and Multisource Comorbidity Score both measured according to hospital admission and drug prescriptions experienced five years before the date of index admission; \* According to the chi-square test or its version for the trend.

**Table S4.** Characteristics of cohort 3 members before and after matching.

|                                     | Cohort 3<br>(N=63,442) |                   |                            |              | Matched cohort 3<br>(N=28,708) |                   |                            |              |
|-------------------------------------|------------------------|-------------------|----------------------------|--------------|--------------------------------|-------------------|----------------------------|--------------|
|                                     | Women<br>(N=20,450)    | Men<br>(N=42,992) | Standardized<br>difference | p-<br>value* | Women<br>(N=14,354)            | Men<br>(N=14,354) | Standardized<br>difference | p-<br>value* |
| <b>Age (years)</b>                  |                        |                   | 0.64                       | <0.001       |                                |                   | 0.09                       | 0.070        |
| 40 – 60                             | 3,394<br>(16.6%)       | 15,265<br>(35.5%) |                            |              | 2,990<br>(20.8%)               | 2,810<br>(19.6%)  |                            |              |
| 61 – 70                             | 4,248<br>(20.8%)       | 12,325<br>(28.7%) |                            |              | 3,387<br>(23.6%)               | 3,656<br>(25.5%)  |                            |              |
| 71 – 80                             | 6,804<br>(33.3%)       | 10,879<br>(25.3%) |                            |              | 4,663<br>(32.5%)               | 4,985<br>(34.7%)  |                            |              |
| 81 – 90                             | 6,004<br>(29.4%)       | 4,523<br>(10.5%)  |                            |              | 3,314<br>(23.1%)               | 2,903<br>(20.2%)  |                            |              |
| <b>ACS diagnosis</b>                |                        |                   | 0.14                       | <0.001       |                                |                   | 0.00                       | 0.776        |
| STEMI                               | 8,529<br>(41.7%)       | 21,172<br>(49.2%) |                            |              | 6,278<br>(43.7%)               | 6,296<br>(43.9%)  |                            |              |
| NSTEMI                              | 7,177<br>(35.1%)       | 13,281<br>(30.9%) |                            |              | 4,826<br>(33.6%)               | 4,828<br>(33.6%)  |                            |              |
| Unstable angina                     | 4,744<br>(23.2%)       | 8,539<br>(19.9%)  |                            |              | 3,250<br>(22.6%)               | 3,230<br>(22.5%)  |                            |              |
| <b>Clinical profile<sup>†</sup></b> |                        |                   | 0.35                       | <0.001       |                                |                   | 0.11                       | 0.005        |
| Good                                | 4,348<br>(21.2%)       | 14,942<br>(34.8%) |                            |              | 3,374<br>(23.5%)               | 3,868<br>(27.0%)  |                            |              |
| Intermediate                        | 7,240<br>(35.4%)       | 14,711<br>(34.2%) |                            |              | 5,265<br>(36.7%)               | 4,868<br>(33.9%)  |                            |              |
| Poor                                | 7,216<br>(35.3%)       | 10,701<br>(24.9%) |                            |              | 4,698<br>(32.7%)               | 4,447<br>(31.0%)  |                            |              |

|                                  |                   |                   |      |        |                   |                   |      |       |
|----------------------------------|-------------------|-------------------|------|--------|-------------------|-------------------|------|-------|
| Very poor                        | 1,646<br>(8.1%)   | 2,638<br>(6.1%)   |      |        | 1,017<br>(7.1%)   | 1,171<br>(8.2%)   |      |       |
| <b>Comorbidities<sup>‡</sup></b> |                   |                   |      |        |                   |                   |      |       |
| Hypertension                     | 15,843<br>(77.5%) | 27,160<br>(63.2%) | 0.32 | <0.001 | 10,603<br>(73.9%) | 10,569<br>(73.6%) | 0.01 | 0.648 |
| Dyslipidaemia                    | 7,475<br>(36.6%)  | 14,997<br>(34.9%) | 0.03 | <0.001 | 5,287<br>(36.8%)  | 5,252<br>(36.6%)  | 0.01 | 0.668 |
| Cerebrovascular<br>disease       | 1,336<br>(6.5%)   | 2,000<br>(4.7%)   | 0.08 | <0.001 | 858 (6.0%)        | 883 (6.2%)        | 0.01 | 0.536 |
| Diabetes                         | 4,106<br>(20.1%)  | 8,192<br>(19.1%)  | 0.03 | 0.002  | 2,854<br>(19.9%)  | 2,863<br>(20.0%)  | 0.00 | 0.894 |
| Chronic renal<br>failure         | 145 (0.7%)        | 334 (0.8%)        | 0.01 | 0.377  | 102 (0.7%)        | 104 (0.7%)        | 0.00 | 0.889 |
| COPD                             | 6,872<br>(33.6%)  | 11,150<br>(25.9%) | 0.17 | <0.001 | 4,562<br>(31.8%)  | 4,603<br>(32.1%)  | 0.01 | 0.604 |
| Depression                       | 5,352<br>(26.2%)  | 4,857<br>(11.3%)  | 0.39 | <0.001 | 2,855<br>(19.9%)  | 2,927<br>(20.4%)  | 0.01 | 0.289 |

<sup>‡</sup>Multisource Comorbidity Score is a comorbidity index obtained from inpatient diagnostic information and outpatient drug prescriptions, and validated using Italian data. Patients were categorized as having good (MCS: 0-4), intermediate (5-9), poor (10-14) or very poor ( $\geq 15$ ) clinical profile.

<sup>‡</sup> Comorbidity and Multisource Comorbidity Score both measured according to hospital admission and drug prescriptions experienced five years before the date of index admission; \* According to the chi-square test or its version for the trend.

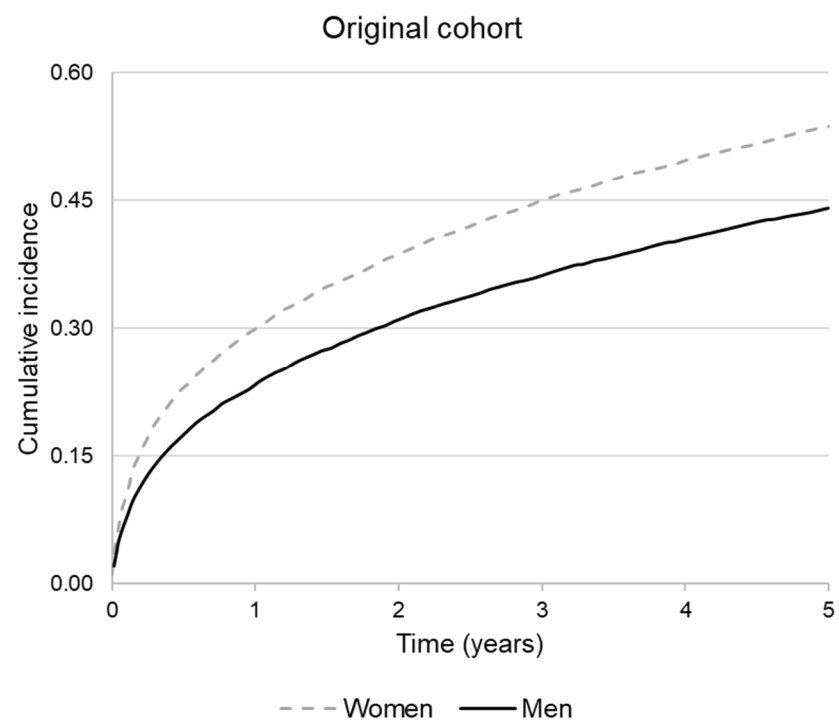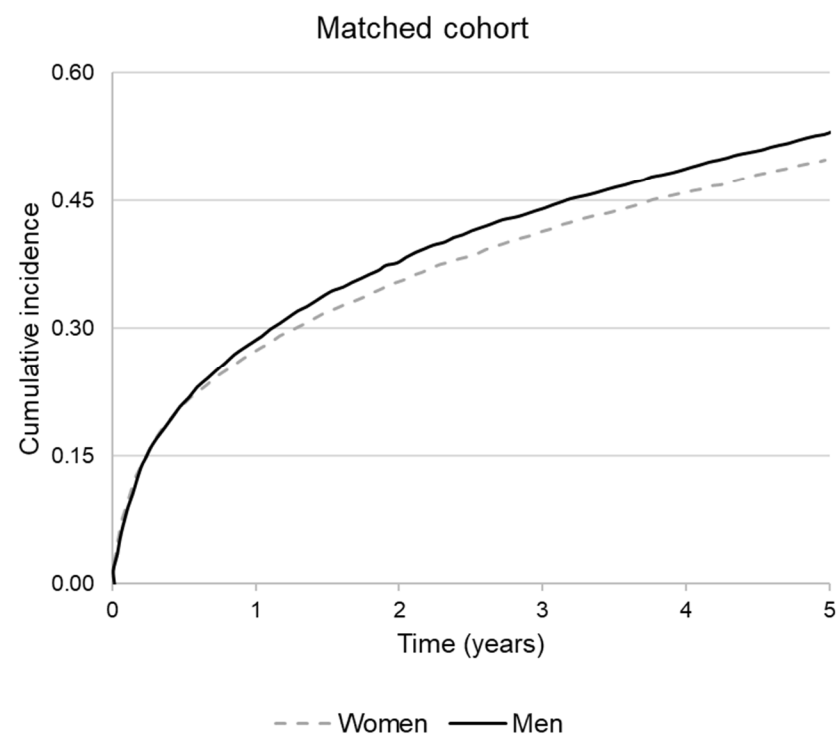

**Figure S1.** Cumulative incidences of health-related outcomes among Propensity Score 1:1 matched and non-matched cohorts, according to sex.
